# Supplementary material for: Assessment of the Potential of Using Nanofiltration Polymeric and Ceramic Membranes to Treat Refinery Spent Caustic Effluents
Source: MDPI journal article supplement (doi:10.3390/membranes12010098), 2022-01-17
Supplement: s1 [file s1]

## Supplementary Material

# Assessment of the Potential of Using Nanofiltration Polymeric and Ceramic Membranes to Treat Refinery Spent Caustic Effluents

Ana Isabel Rita <sup>1,2,3</sup>, Ana Rita Nabais <sup>3</sup>, Luisa A. Neves <sup>3</sup>, Rosa Huertas <sup>3,4</sup>, Maria Santos <sup>1</sup>, Luis M. Madeira <sup>2</sup> and Sandra Sanches <sup>4,\*</sup>

<sup>1</sup> Sines Refinery, Petrogal S.A., 7520-952 Sines, Portugal; aibr1910@gmail.com (R.A.I.); maria.santos@galp.com (S.M.)

<sup>2</sup> LEPABE-Laboratory for Process Engineering, Environment, Biotechnology and Energy, Faculty of Engineering, University of Porto, Rua Dr. Roberto Frias, 4200-465 Porto, Portugal; mmadeira@fe.up.pt

<sup>3</sup> LAQV/REQUIMTE, Chemistry Department, Nova School of Science and Technology, Universidade NOVA de Lisboa, 2829-516 Caparica, Portugal; a.nabais@campus.fct.unl.pt (N.A.R.); lan11892@fct.unl.pt (N.L.A.); rosa.huertas@ibet.pt (H.R.M.)

<sup>4</sup> IBET-Instituto de Biologia Experimental e Tecnológica, Apartado 12, 2780-157 Oeiras, Portugal

\* Correspondence: sandramsanches@gmail.com

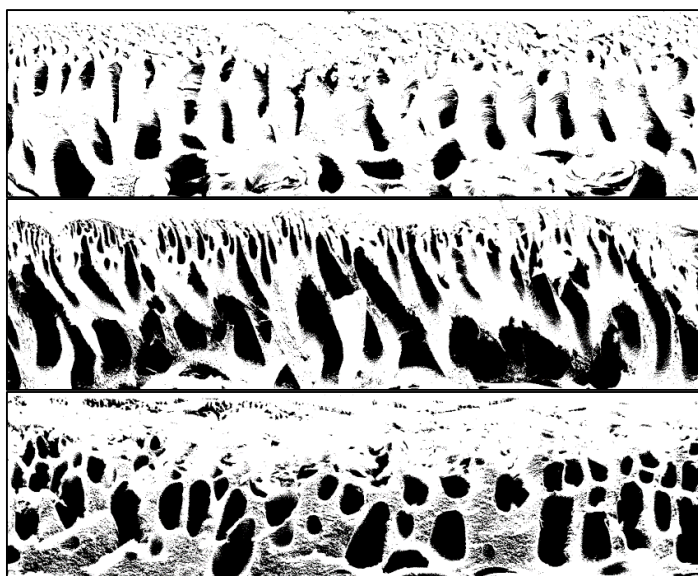

**Figure S1.** - SEM binarized cross section images, using a threshold of 149 for Pristine Membrane (up), and 255 for Membrane 6 (middle) and Membrane 12 (down).

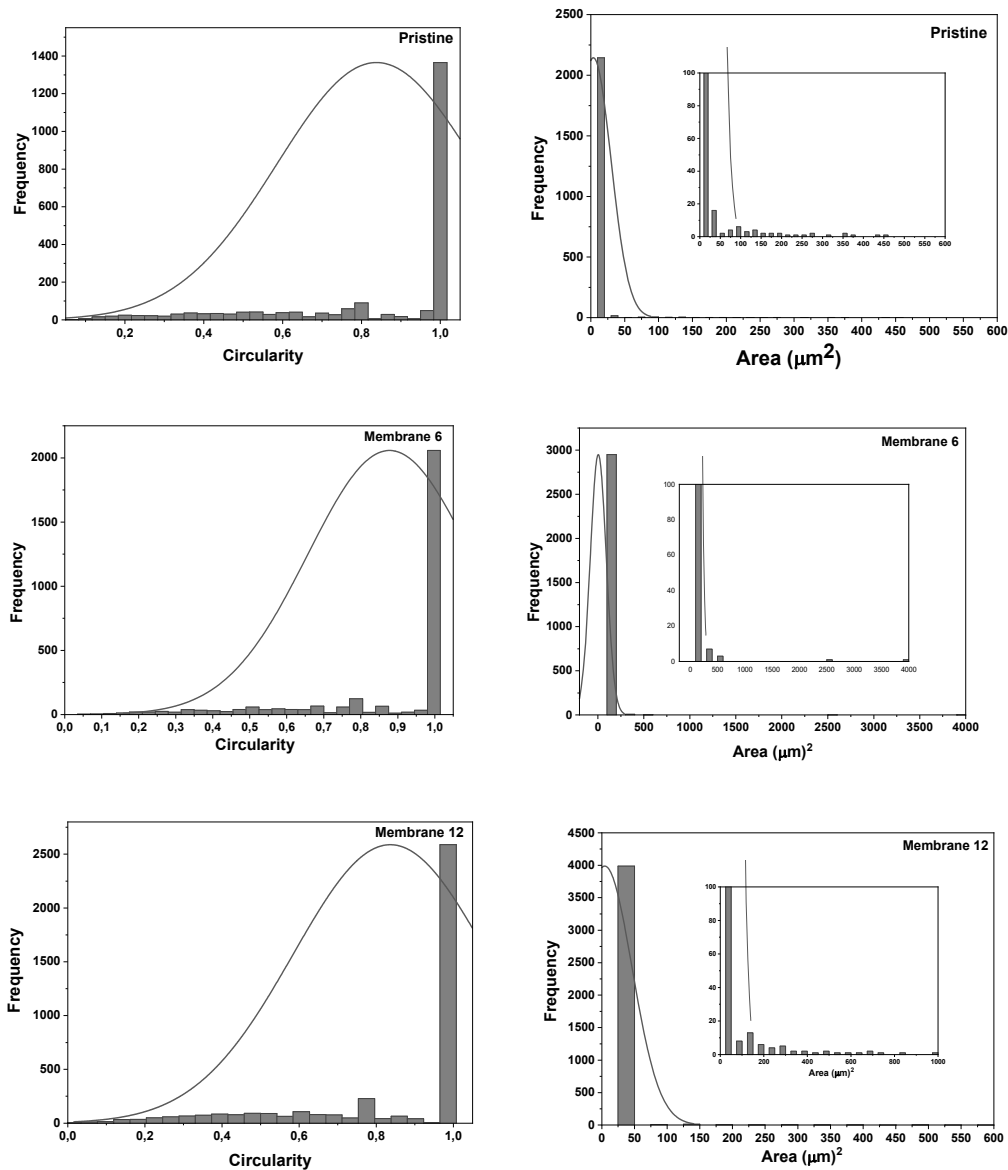

**Figure S2.** - Representation of the circularity (left) and porous area ( $\mu\text{m}^2$ ) (right) distribution, for all porous (counts) detected by the ImageJ software: Pristine (Up), Membrane 6 (middle) and Membrane 12 (down). (Obtained with Origin Software).

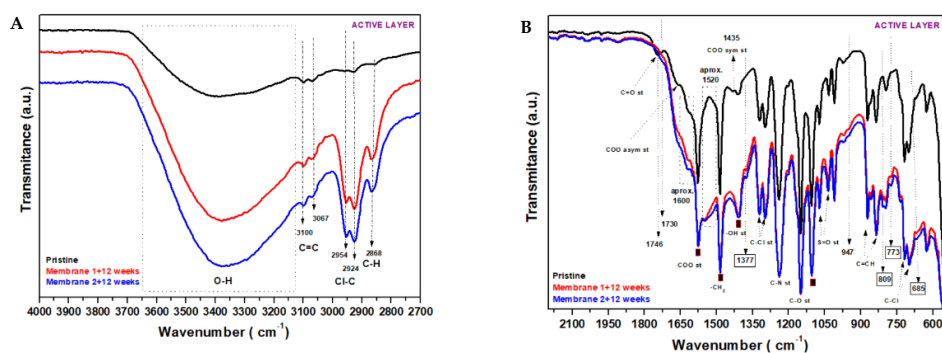

**Figure S3.** - FT-IR spectra magnifications in regions 4000–2700  $\text{cm}^{-1}$  (A) and 2200–550  $\text{cm}^{-1}$  (B) of the active layer of the pristine membrane and membranes after 12 weeks immersion in spent caustic (made in duplicate).

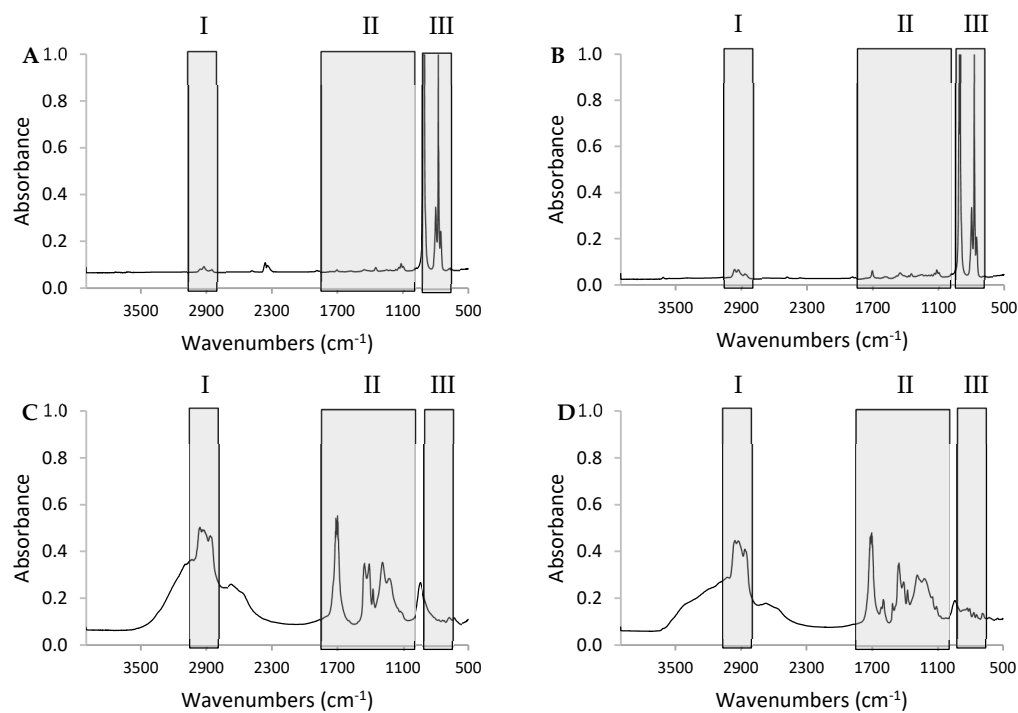

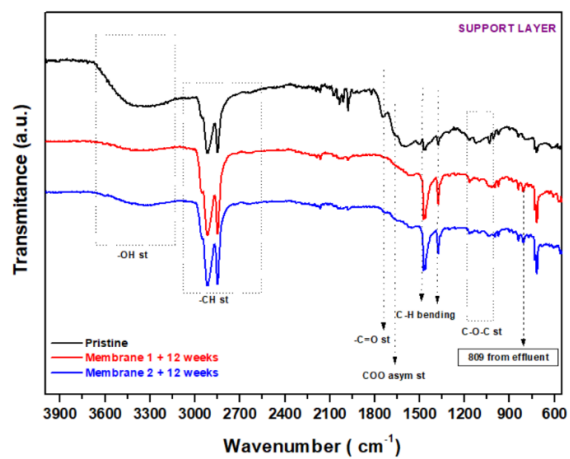

**Figure S5.** - FT-IR spectra of support layer for pristine membrane and membranes (made in duplicate) after 12 weeks immersed in spent caustic effluent.
